# Supplementary material for: A core–shell model of polymetallic hybrid metal halides
Source: Royal Society of Chemistry journal article supplement (doi:10.1039/d4cc04454a), 2024-01-01
Supplement: d4cc04454a1.pdf [file d4cc04454a1.pdf]

## Supporting Information

### A core-shell model of polymetallic hybrid metal halides

Dongjie Tian,<sup>a,b,c</sup> Jie Lin,<sup>a</sup> Adel Mesbah,<sup>b</sup> Jiajing Zhou,<sup>a</sup> Mianji Yang,<sup>a</sup> Romain Gautier\*<sup>d</sup> and Xi Chen\*<sup>a</sup>

<sup>a</sup> Department of Chemistry and the MOE Key Laboratory of Spectrochemical Analysis & Instrumentation, College of Chemistry and Chemical Engineering, Xiamen University, Xiamen 361005, China, E-mail: xichen@xmu.edu.cn

<sup>b</sup> Université Claude Bernard Lyon 1, CNRS, IRCELYON, Villeurbanne F-69626, France

<sup>c</sup> College of Sciences, Henan Agricultural University, Zhengzhou 450002, China

<sup>d</sup> Nantes Université, CNRS, Institut des Matériaux de Nantes Jean Rouxel, IMN, Nantes F-44000, France, E-mail: romain.gautier@cncrs-imn.fr

#### Table of Contents

|                                                                                                                                                              |    |
|--------------------------------------------------------------------------------------------------------------------------------------------------------------|----|
| Experimental Procedures.....                                                                                                                                 | S2 |
| Scheme S1. The synthesis process of <b>1</b> , <b>2-0</b> and <b>2-24</b> .....                                                                              | S3 |
| Figure S1. The EDX data of <b>2-24</b> .....                                                                                                                 | S4 |
| Figure S2. Observed, calculated, and the difference patterns after the profile (le-bail) refinement of the compounds <b>2-0</b> (a) and <b>2-24</b> (b)..... | S4 |
| Figure S3. Element mapping of Mn (a) and Pb (b) in <b>2-0</b> .....                                                                                          | S4 |
| Figure S4. Thermogravimetric Analysis of <b>2-0</b> (top) and <b>2-24</b> (bottom).....                                                                      | S5 |
| Table S1. The unit cell data of <b>1</b> and <b>2-24</b> .....                                                                                               | S6 |
| Table S2. Crystal data and structure refinement for <b>1</b> .....                                                                                           | S6 |
| Table S3. Lifetime decay of <b>1</b> , <b>2-0</b> and <b>2-24</b> .....                                                                                      | S6 |
| References.....                                                                                                                                              | S6 |

#### Experimental Procedures

**Materials.** All experiments were carried out in the air atmosphere with standard Schlenk technology. 2-(piperazin-1-yl) ethan-1-amine, PbBr<sub>2</sub>, MnCl<sub>2</sub>·4H<sub>2</sub>O and HBr (47% solution in H<sub>2</sub>O) were purchased from Merger (Shanghai) Chemical Technology Company. All solvents (acetone and diethyl ether) were purchased from Sinopharm Chemical Reagent Company and stored in accordance with standard procedures.

**Synthesis of **1**.** 2-(piperazin-1-yl)ethan-1-amine (0.046 g, 0.36 mmol) and PbBr<sub>2</sub> (0.132 g, 0.36 mmol) were mixed in an appropriate amount of HBr (47%, in H<sub>2</sub>O) and heated to reflux (the reactants dissolve completely). The reaction system was cooled slowly. After 24 h, yellowish block crystals were formed. Then wash with cold acetone, bulk crystals of **1** were obtained. Isolated yield: 0.082 g, 46% yield. <sup>1</sup>H NMR (500 MHz, DMSO-*d*<sub>6</sub>), δ (TMS, ppm): 9.01 (s, 2H), 7.97 (s, 3H), 3.37-3.17 (m, 12H). <sup>13</sup>C NMR (125 MHz, DMSO-*d*<sub>6</sub>), δ (TMS, ppm): 52.90, 48.67.

**Synthesis of **2-0**.** 2-(piperazin-1-yl)ethan-1-amine (0.067 g, 0.52 mmol), PbBr<sub>2</sub> (0.191 g, 0.52 mmol) and MnCl<sub>2</sub>·4H<sub>2</sub>O (0.412 g, 2.08 mmol) were mixed in an appropriate amount of HBr (47%, in H<sub>2</sub>O) and heated to reflux (the reactants dissolve completely). The reaction system was immediately cooled using an ice-water bath. Orange solid powder was formed. Then wash with cold acetone, **2-0** were obtained. Isolated yield: 0.287 g, 43% yield. <sup>1</sup>H NMR (500 MHz, DMSO-*d*<sub>6</sub>), δ (TMS, ppm): 9.03 (s, 2H), 7.99 (s, 3H), 3.38-3.19 (m, 12H). <sup>13</sup>C NMR (125 MHz, DMSO-*d*<sub>6</sub>), δ (TMS, ppm): 52.74, 48.53.

**Synthesis of **2-24**.** 2-(piperazin-1-yl)ethan-1-amine (0.077 g, 0.60 mmol), PbBr<sub>2</sub> (0.219 g, 0.60 mmol) and MnCl<sub>2</sub>·4H<sub>2</sub>O (0.472 g, 2.38 mmol) were mixed in an appropriate amount of HBr (47%, in H<sub>2</sub>O) and heated to reflux (the reactants dissolve completely). The reaction system was cooled slowly to room temperature for 24 hours. Orange block crystals were formed. Then wash with cold acetone, **2-24** were obtained. Isolated yield: 0.385 g, 50% yield. <sup>1</sup>H NMR (500 MHz, DMSO-*d*<sub>6</sub>), δ (TMS, ppm): 9.02 (s, 2H), 7.98 (s, 3H), 3.37-3.18 (m, 12H). <sup>13</sup>C NMR (125 MHz, DMSO-*d*<sub>6</sub>), δ (TMS, ppm): 52.86, 48.63.

**Physical measurements.** Full sphere data were collected on single crystals with good quality using a synergy Diffraction Micro-focus spot diffractometer with graphite-monochromatized Cu K $\alpha$  radiation ( $\lambda = 1.54184 \text{ \AA}$ ), operating at 50 kV and 1 mA under N<sub>2</sub> flow. Crystal data were integrated and corrected for absorption (numerical) using the CrysAlispro programs. Crystal structures were solved by direct methods and refined by full-matrix least-squares on F<sub>2</sub> using the OLEX2 program package.<sup>3</sup> Powder X-Ray Diffractometer (PXRD) analysis was performed using a Rigaku Smart-Lab-SE X Powder X-Ray Diffractometer (Cu K $\alpha$  graphite,  $\lambda = 1.5406 \text{ \AA}$ ) operating at 40 kV/20 mA. The collected data were refined using the le-bail method using the Full prof suite program.<sup>4</sup> Scanning electron micrographs (SEM) images and mapping characterization were obtained by a Hitachi S-4800 scanning electron microscope. <sup>1</sup>H NMR and <sup>13</sup>C NMR spectra were measured using a Bruker Bio-Spin GmbH in ppm downfield from Me<sub>4</sub>Si. X-ray photoelectron spectroscopy (XPS) was performed using a Thermo Fisher Scientific Escalab 250Xi spectrometer equipped with a monochromatized aluminum source (Al K $\alpha = 1486.8 \text{ eV}$ ) and charge compensation gun. TGA was recorded from R.T. to 800°C with the 10 K min<sup>-1</sup> in nitrogen atmosphere on a TA Instruments SDT Q600 in a N<sub>2</sub> atmosphere.

[CCDC 2206169 contains the supplementary crystallographic data for this paper. These data can be obtained free of charge from The Cambridge Crystallographic Data Centre via [www.ccdc.cam.ac.uk/data\\_request/cif](http://www.ccdc.cam.ac.uk/data_request/cif).]

**Optical Measurements.** Optical diffuse reflectance measurements were performed using a CACY5000 UV-Vis NIR spectrometer operating in the 200–800 nm region at room temperature and BaSO<sub>4</sub> as the 100% reflectance reference. The reflectance data were converted to absorption according to the Kubelka–Munk equation:<sup>5</sup>  $\alpha/S = (1 - R)^2 (2R)^{-1}$ , where R is the reflectance,  $\alpha$  and S are the absorption and scattering coefficients, respectively. Steady-state and time-resolved photoluminescence (TRPL) spectra were acquired using Edinburgh FS5 spectrophotometer equipped with a xenon lamp and a TCSPC module (diode laser excitation at  $\lambda = 365 \text{ nm}$ ) and an integrating sphere for absolute PLQY determination. The spectra were corrected for the monochromator wavelength dependence and photomultiplier response functions provided by the manufacturer.

## Results and Discussion

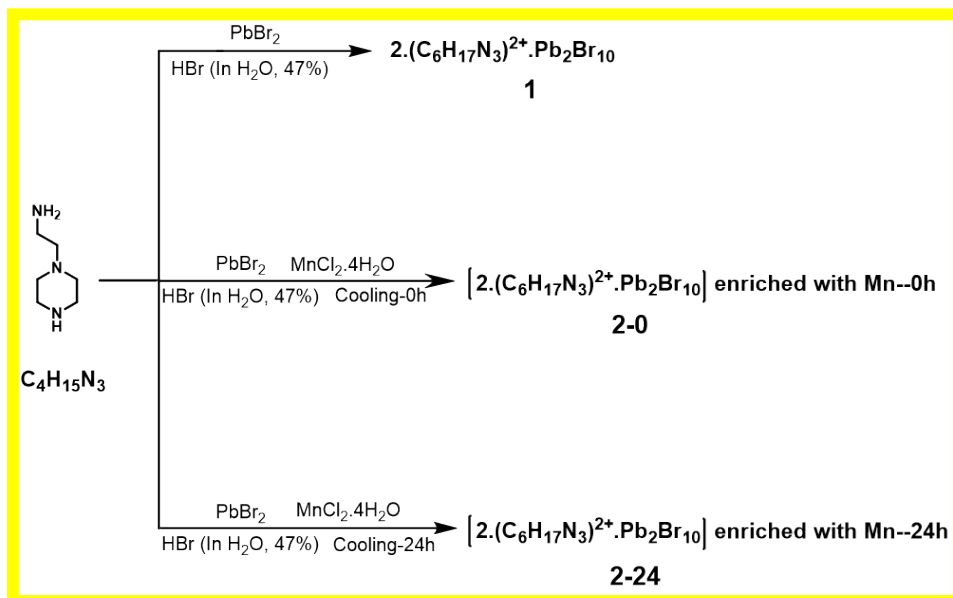

**Scheme S1.** The synthesis process of **1**, **2-0** and **2-24**.

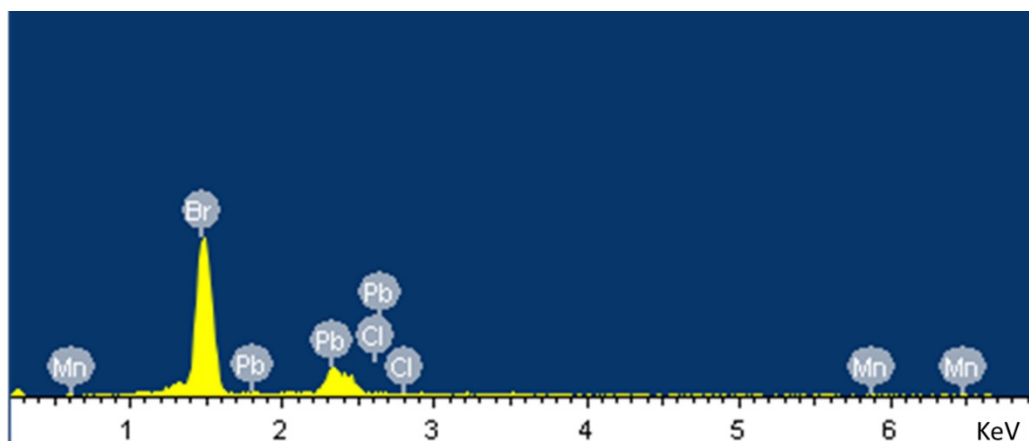

Figure S1. The EDX data of 2-24.

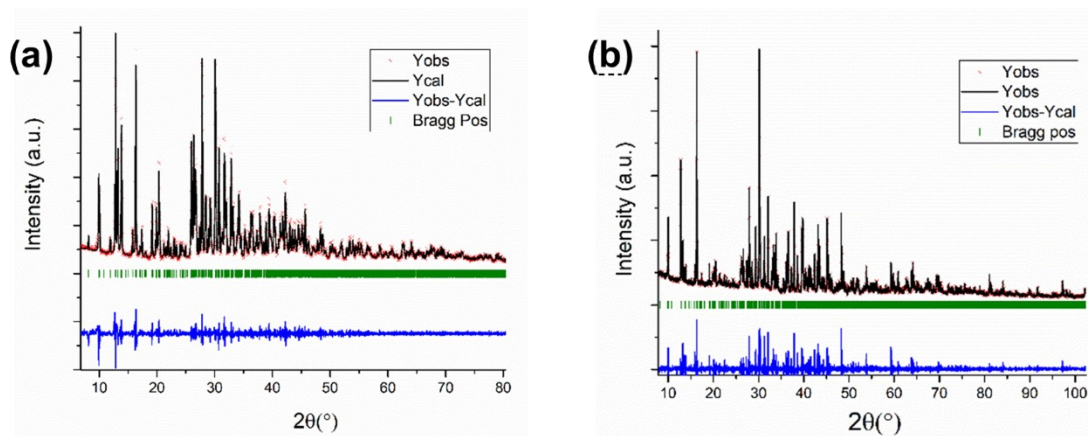

Figure S2. Observed, calculated, and the difference patterns after the profile (le-bail) refinement of the compounds 2-0 (top) and 2-24 (bottom).

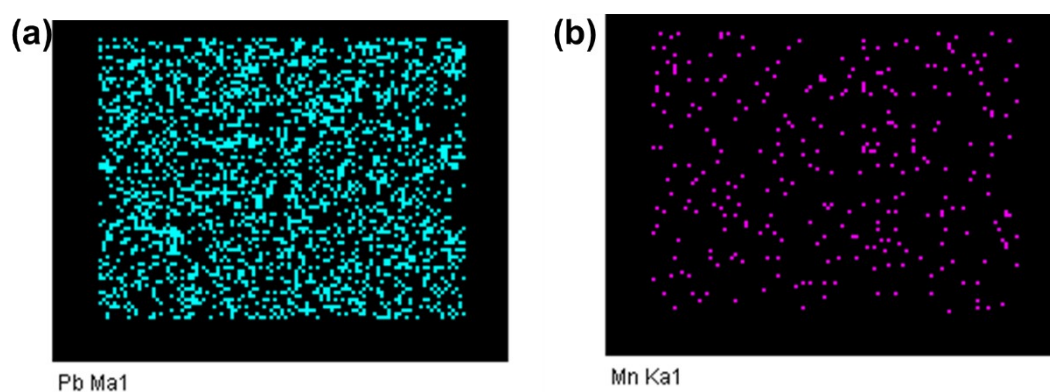

Figure S3. Element mapping of Mn (a) and Pb (b) in 2-0.

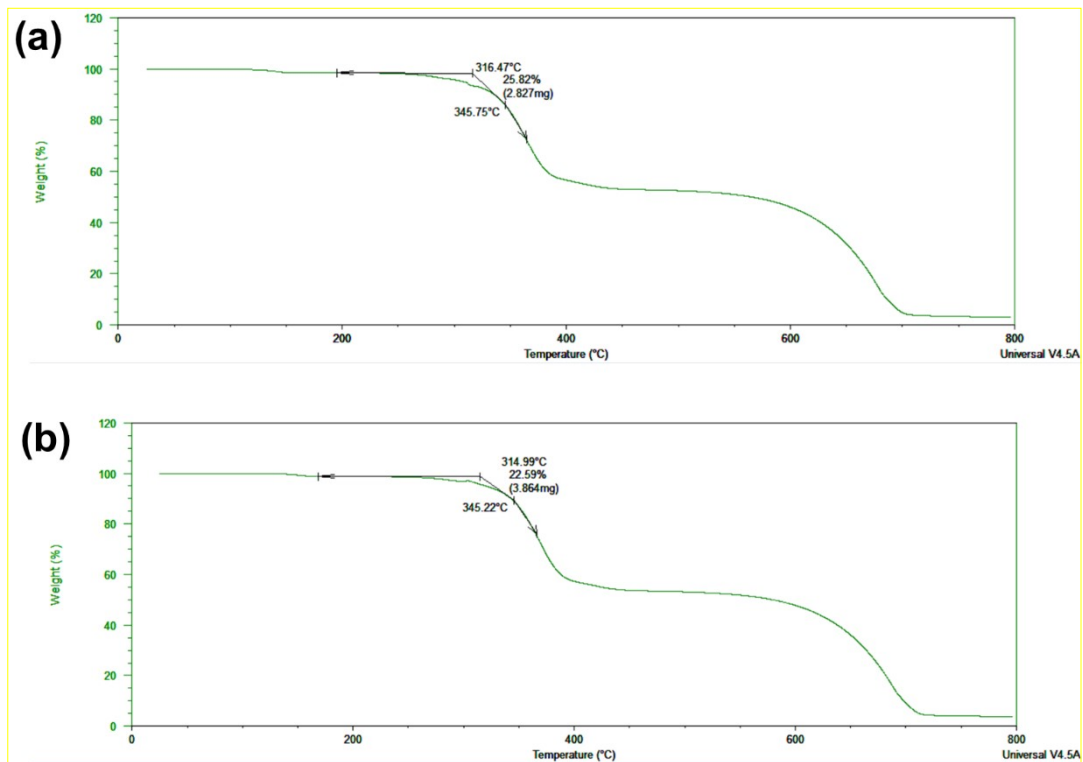

Figure S4. Thermogravimetric Analysis of 2-0 (top) and 2-24 (bottom).

**Table S1.** The unit cell data of **1** and **2-24** refined using single crystal data at 100K and from powder data at RT.

| Sample              | <b>1 (100K)</b> | <b>2-24 (100K)</b> | <b>1 (RT)</b> | <b>2-0 (RT)</b> | <b>2-24</b> |
|---------------------|-----------------|--------------------|---------------|-----------------|-------------|
| a (Å)               | 13.77           | 13.74              | 13.9018(17)   | 13.8504(2)      | 13.8631(4)  |
| b (Å)               | 17.52           | 17.50              | 13.9018(17)   | 17.5660(3)      | 17.5341(5)  |
| c (Å)               | 13.77           | 13.75              | 13.8567(13)   | 13.8402(2)      | 13.8169(3)  |
| $\beta$ (°)         | 96.2            | 96.2               | 96.14(1)      | 96.15           | 96.13(1)    |
| V (Å <sup>3</sup> ) | 3304            | 3286               | 3364.88(61)   | 3347.84(9)      | 3339.41(15) |

**Table S2.** Crystal data and structure refinement for **1**.

|                           | <b>1</b>                                                                                          | <b>2-24</b>                                                                         |
|---------------------------|---------------------------------------------------------------------------------------------------|-------------------------------------------------------------------------------------|
| Formula                   | C <sub>12</sub> H <sub>37</sub> N <sub>6</sub> Pb <sub>2</sub> Br <sub>10</sub> ·H <sub>2</sub> O | C <sub>12</sub> H <sub>37</sub> N <sub>6</sub> Pb <sub>2</sub> Br <sub>10</sub> ·Mn |
| Mr(g/mol)                 | 1494.95                                                                                           | 1491.93                                                                             |
| Crystal system            | Monoclinic                                                                                        | Monoclinic                                                                          |
| Space group               | <i>P</i> <sub>2</sub> <sub>1</sub> / <i>c</i>                                                     | <i>P</i> <sub>2</sub> <sub>1</sub> / <i>c</i>                                       |
| Z                         | 4                                                                                                 | 4                                                                                   |
| Temp.(K)                  | 150                                                                                               | 100                                                                                 |
| $\mu$ (mm <sup>-1</sup> ) | 22.287                                                                                            | 34.086                                                                              |
| <i>a</i> /(Å)             | 13.7743(4)                                                                                        | 13.7379(1)                                                                          |
| <i>b</i> /(Å)             | 17.5198(7)                                                                                        | 17.4999(1)                                                                          |
| <i>c</i> /(Å)             | 13.7748(4)                                                                                        | 13.7514(1)                                                                          |
| $\alpha$ /(°)             | 90.00                                                                                             | 90.00                                                                               |
| $\beta$ /(°)              | 96.25                                                                                             | 96.25                                                                               |
| $\gamma$ /(°)             | 90.00                                                                                             | 90.00                                                                               |
| V/Å <sup>3</sup>          | 3304.43(19)                                                                                       | 3286.36(4)                                                                          |
| R1(I > $\sigma$ (I))      | 0.0356                                                                                            | 0.0369                                                                              |
| wR2(all data)             | 0.0831(6748)                                                                                      | 0.1062(6326)                                                                        |

**Table S3.** Lifetime decay of **1**, **2-0** and **2-24**.

| Sample      | $\tau_1$ /ns | $\tau_2$ /ns | $\tau_3$ /ns | $\tau$ /ns |
|-------------|--------------|--------------|--------------|------------|
| <b>1</b>    | 120.9        | 134.3        | 147.7        | 135.2      |
| <b>2-0</b>  | 54.3         | 60.3         | 66.3         | 60.7       |
| <b>2-24</b> | 76.7         | 85.2         | 93.8         | 85.8       |

## References

1. A. Biswas, R. Bakthavatsalam, S. R. Shaikh, A. Shinde, A. Lohar, S. Jena, R. G. Gonnade, J. Kundu, *Chem. Mater.* **2019**, *31*, 2253-2257.
2. Q. Ba, A. Jana, L. Wang, K. S. Kim, *Adv. Funct. Mater.* **2019**, *29*, 1904768-1904777.
3. Dolomanov, O. V.; Bourhis, L. J.; Gildea, R. J.; Howard, J. A. K.; J. *Appl. Crystallogr.* **2009**, *42*, 339-341.
4. Frontera, C.; Rodríguez-Carvajal, J., *Phys. Rev. B Condens. Matter* **2003**, *335 (1-4)*, 219-222.
4. Kortüm, G.; Braun, W.; Herzog, G. *Angew. Chem., Int. Ed. Engl.* **1963**, *2*, 333-341.
